Correction

# Correction: Vitamin D Status and Community-Acquired Pneumonia: Results from the Third National Health and Nutrition Examination Survey

The PLOS ONE Staff

There is an error in the first column of Table 1 under the sub-category of "Asthma."

**Table 1.** Characteristics of the overall study cohort and in the subset with community acquired pneumonia.

|                | Overall Study Cohort (Total Observations) | CAP - Number of Observations (% of overall study subsets) | P-value |
|----------------|-------------------------------------------|-----------------------------------------------------------|---------|
| <b>25(OH)D</b> |                                           |                                                           |         |
| <10 ng/mL      | 641                                       | 20 (3.12)                                                 | <0.001  |
| 10-19.9 ng/mL  | 5110                                      | 85 (1.67)                                                 |         |
| 20-29.9 ng/mL  | 5931                                      | 144 (2.43)                                                |         |
| ≥30 ng/mL      | 5293                                      | 72 (1.36)                                                 |         |
| <b>Season</b>  |                                           |                                                           |         |
| Winter         | 4555                                      | 84 (1.84)                                                 | 0.15    |
| Spring         | 5415                                      | 127 (2.35)                                                |         |
| Summer         | 4456                                      | 98 (2.20)                                                 |         |
| Fall           | 5613                                      | 102 (1.82)                                                |         |
| <b>Age</b>     |                                           |                                                           |         |
| 17-39 years    | 8602                                      | 101 (1.17)                                                | <0.001  |
| 40-60 years    | 4851                                      | 115 (2.37)                                                |         |
| ≥60 years      | 6586                                      | 195 (1.77)                                                |         |
| <b>Sex</b>     |                                           |                                                           |         |
| Female         | 10641                                     | 245 (2.30)                                                | 0.008   |
| Male           | 9398                                      | 166 (1.77)                                                |         |
| <b>Race</b>    |                                           |                                                           |         |
| Non-white      | 6310                                      | 87 (1.38)                                                 | <0.001  |
| White          | 13729                                     | 324 (2.36)                                                |         |

**Citation:** The PLOS ONE Staff (2014) Correction: Vitamin D Status and Community-Acquired Pneumonia: Results from the Third National Health and Nutrition Examination Survey. PLoS ONE 9(3): e91425. doi:10.1371/journal.pone.0091425

**Published** March 7, 2014

**Copyright:** © 2014 The PLOS ONE Staff. This is an open-access article distributed under the terms of the Creative Commons Attribution License, which permits unrestricted use, distribution, and reproduction in any medium, provided the original author and source are credited.

Table 1. Cont.

|                           | Overall Study Cohort (Total Observations) | CAP - Number of Observations (% of overall study subsets) | P-value |
|---------------------------|-------------------------------------------|-----------------------------------------------------------|---------|
| <b>Poverty ratio</b>      |                                           |                                                           |         |
| ≤FPL                      | 4295                                      | 86 (2.00)                                                 | 0.86    |
| >FPL                      | 15744                                     | 324 (2.06)                                                |         |
| <b>BMI</b>                |                                           |                                                           |         |
| <20 kg/m <sup>2</sup>     | 1470                                      | 49 (3.33)                                                 | 0.004   |
| 20-24.9 kg/m <sup>2</sup> | 7163                                      | 134 (1.87)                                                |         |
| 25-29.9 kg/m <sup>2</sup> | 6446                                      | 123 (1.91)                                                |         |
| ≥30 kg/m <sup>2</sup>     | 3567                                      | 82 (2.30)                                                 |         |
| <b>Region</b>             |                                           |                                                           |         |
| Northeast                 | 29298                                     | 50 (1.71)                                                 | 0.31    |
| Midwest                   | 3852                                      | 86 (2.33)                                                 |         |
| South                     | 8556                                      | 169 (1.98)                                                |         |
| West                      | 4703                                      | 106 (2.25)                                                |         |
| <b>Smoking</b>            |                                           |                                                           |         |
| Yes                       | 4990                                      | 110 (2.20)                                                | 0.39    |
| No                        | 15049                                     | 301 (2.00)                                                |         |
| <b>Asthma</b>             |                                           |                                                           |         |
| Yes                       | 1376                                      | 94 (6.83)                                                 | <0.001  |
| No                        | 18663                                     | 317 (1.70)                                                |         |
| <b>COPD</b>               |                                           |                                                           |         |
| Yes                       | 1421                                      | 128 (9.00)                                                | <0.001  |
| No                        | 18618                                     | 279 (1.52)                                                |         |
| <b>CHF</b>                |                                           |                                                           |         |
| Yes                       | 757                                       | 56 (7.40)                                                 | <0.001  |
| No                        | 19265                                     | 353 (1.83)                                                |         |
| <b>Diabetes mellitus</b>  |                                           |                                                           |         |
| Yes                       | 1614                                      | 70 (4.33)                                                 | <0.001  |
| No                        | 18410                                     | 341 (1.85)                                                |         |
| <b>Stroke</b>             |                                           |                                                           |         |
| Yes                       | 649                                       | 23 (3.54)                                                 | 0.006   |
| No                        | 19393                                     | 388 (2.00)                                                |         |
| <b>CKD</b>                |                                           |                                                           |         |
| eGFR <60                  | 3388                                      | 92 (2.72)                                                 | <0.001  |
| eGFR ≥60                  | 12872                                     | 221 (1.72)                                                |         |
| <b>Neutropenia</b>        |                                           |                                                           |         |
| WBC <3.5x10 <sup>3</sup>  | 187                                       | 2 (1.07)                                                  | 0.393   |
| WBC ≥3.5x10 <sup>3</sup>  | 16983                                     | 328 (1.93)                                                |         |

**Table 1. Cont.**

|                            | Overall Study Cohort (Total Observations) | CAP - Number of Observations (% of overall study subsets) | P-value |
|----------------------------|-------------------------------------------|-----------------------------------------------------------|---------|
| <b>Alcohol consumption</b> |                                           |                                                           |         |
| ≤30 drinks per month       | 1211                                      | 21 (1.73)                                                 | 0.428   |
| >30 drinks per month       | 18771                                     | 389 (2.07)                                                |         |

CAP = Community-acquired pneumonia; 25(OH)D = 25-hydroxyvitamin D; FPL = federal poverty level; BMI = body mass index; COPD = chronic obstructive pulmonary disease; CHF = congestive heart failure; CKD = chronic kidney disease; eGFR = estimated glomerular filtration rate; WBC = white blood cell count. P-values are based on the chi-square test for categorical variables and on simple ordinal logistic regression for ordinal variables, with 2-tailed  $P < 0.05$  considered as statistically significant.

doi:10.1371/journal.pone.0081120.t001

Additionally, there is an error in the title for Table 2.

**Table 2. Multivariable model of factors independently associated with the risk of community-acquired pneumonia (with adjusted odds ratios) in participants with 25-hydroxyvitamin D levels <30 ng/mL versus ≥30 ng/mL.**

|                                              | Odds Ratio (95% Confidence Interval) |
|----------------------------------------------|--------------------------------------|
| <b>25(OH)D (&lt; 30 ng/ml vs. ≥30 ng/ml)</b> |                                      |
|                                              | <b>1.56 (1.17-2.07)</b>              |
| Age (Years)                                  | 1.10 (1.01-1.19)                     |
| Race (White vs. Non-white)                   | 1.64 (1.21-2.21)                     |
| Asthma                                       | 2.70 (2.00-3.66)                     |
| Chronic obstructive pulmonary disease        | 4.11 (3.09-5.47)                     |
| Congestive heart failure                     | 1.87 (1.22-2.88)                     |
| Diabetes mellitus                            | 1.53 (1.08-2.18)                     |

25(OH)D = 25-hydroxyvitamin D.

doi:10.1371/journal.pone.0081120.t002

## Reference

1. Quraishi SA, Bittner EA, Christopher KB, Camargo CA Jr (2013) Vitamin D Status and Community-Acquired Pneumonia: Results from the Third National Health and Nutrition Examination Survey. PLoS ONE 8(11): e81120. doi:10.1371/journal.pone.0081120
